# Supplementary material for: Bromine-substituted triphenylamine derivatives with improved hole-mobility for highly efficient green phosphorescent OLEDs with a low operating voltage
Source: Royal Society of Chemistry journal article supplement (doi:10.1039/c6tc03020c), 2016-01-01
Supplement: c6tc03020c1.pdf [file c6tc03020c1.pdf]

Supporting Information

## Bromine-Substituted Triphenylamine Derivatives with Improved Hole-Mobility for Highly Efficient Green Phosphorescent OLEDs with Low Operating Voltage

Xiaoyang Du,<sup>a</sup> Juewen Zhao,<sup>a</sup> Wei Liu,<sup>b</sup> Kai Wang,<sup>b</sup> Shaolin Yuan,<sup>a</sup> Caijun Zheng,<sup>\*,a</sup> Hui Lin,<sup>a</sup> Silu Tao,<sup>\*,a</sup> Xiao-Hong Zhang<sup>b</sup>

<sup>a</sup>*School of Optoelectronic Information, University of Electronic Science and Technology of China (UESTC), Chengdu 610054, PR China*

<sup>b</sup>*Functional Nano and Soft Materials Laboratory (FUNSOM) and Collaborative Innovation Center of Suzhou Nano Science and Technology Soochow University, Suzhou, Jiangsu 215123, PR. China*

Corresponding author: E-mail: zhengcaijun@uestc.edu.cn (C. J. Zheng), silutao@uestc.edu.cn (S. L. Tao).

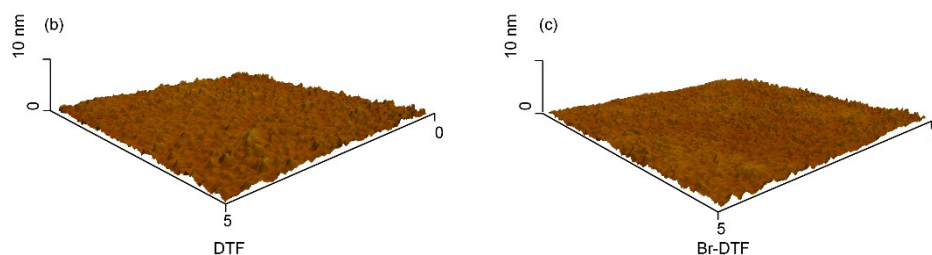

Figure S1. AFM morphologies of DTF and Br-DTF deposited on quartz substrate by vacuum evaporation.

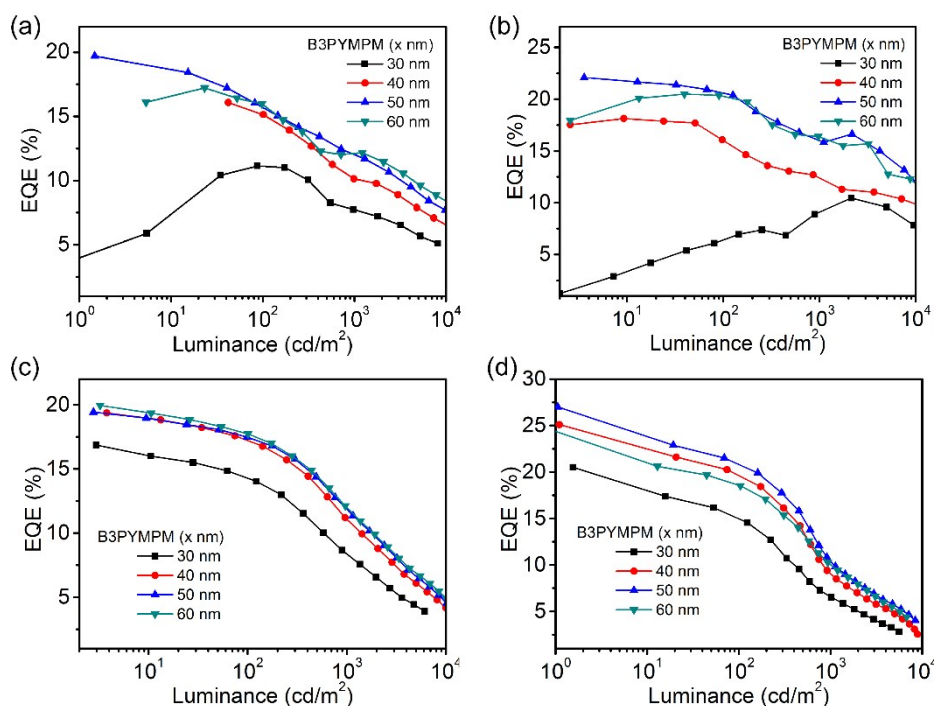

Figure S2. EQEs versus luminance characteristics of DQTPA-, Br-DQTPA-, DTF- and Br-DTF- based green phosphorescent devices without hole injection layer MoO<sub>3</sub>. Device structures: ITO/ DQTPA(a) or Br-DQTPA(b) or DTF(c) or Br-DTF(d) (40 nm)/ CBP: 8% Ir(ppy)<sub>2</sub>acac (30 nm)/ B3PYMPM ( x nm)/ LiF (1 nm)/Al (100 nm), x ranged from 30 nm to 60 nm.

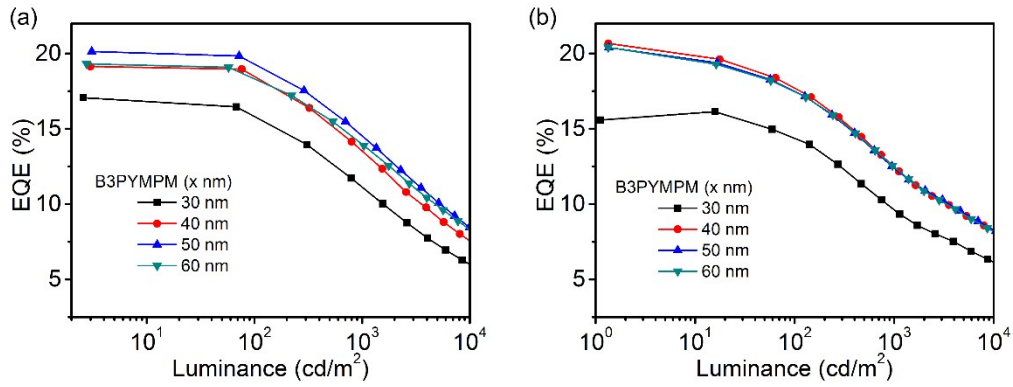

Figure S3. EQEs versus luminance characteristics of control devices using TAPC and TCTA as HTLs. Device structures: ITO/ TAPC(a) or TCTA(b) (40 nm)/ CBP: 8% Ir(ppy)<sub>2</sub>acac (30 nm)/ B3PYMPM ( x nm)/ LiF (1 nm)/Al (100 nm), x ranged from 30 nm to 60 nm.

Table S1: Summary of the optimal green phosphorescent devices without MoO<sub>3</sub> in this work

| Characters               | DQTPA | Br-DQTPA | DTF  | Br-DTF | TAPC | TCTA |
|--------------------------|-------|----------|------|--------|------|------|
| Von @ 1cd/m <sup>2</sup> | 2.8   | 2.7      | 2.8  | 2.6    | 2.9  | 2.6  |
| Max. EQE (%)             | 19.7  | 22.1     | 19.9 | 27.0   | 20.1 | 20.7 |
| Max. CE (cd/A)           | 70.8  | 81.7     | 72.8 | 90.4   | 74.3 | 75.5 |
| Max. PE (lm/W)           | 79.4  | 85.5     | 76.6 | 109.2  | 80.4 | 90.9 |
